# Supplementary material
Source: PubMed Central journal article supplement (PMC10992778)

Supplementary Figure 1.

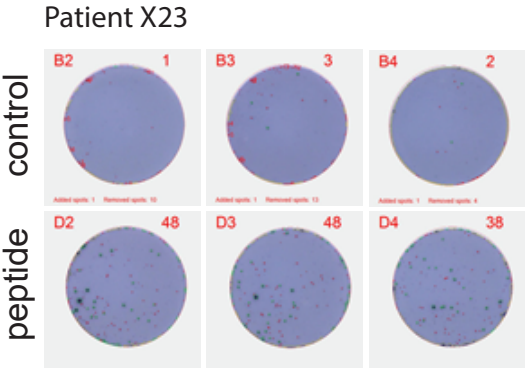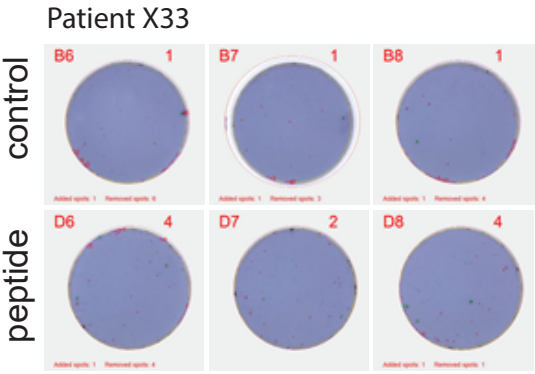

Supplement: 262_2021_2984_MOESM2_ESM.pdf [file 262_2021_2984_MOESM2_ESM.pdf]
