# Supplementary material
Source: PubMed Central journal article supplement (PMC10992778)

## Supplementary figure 2

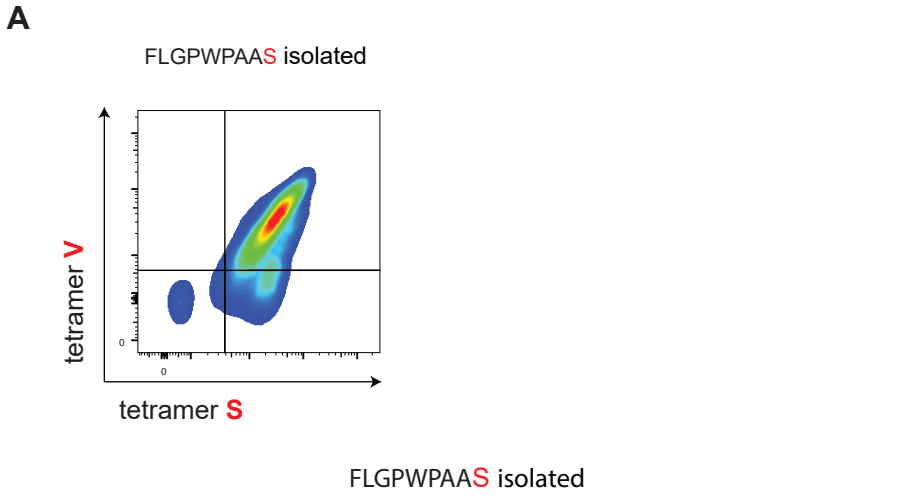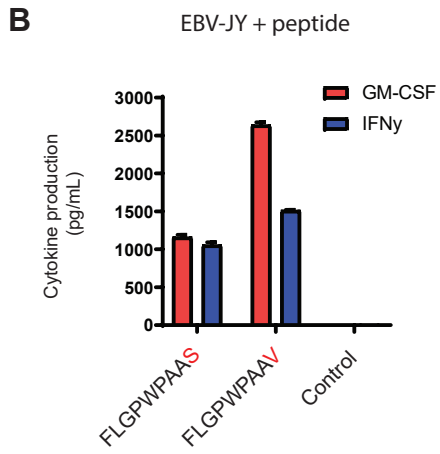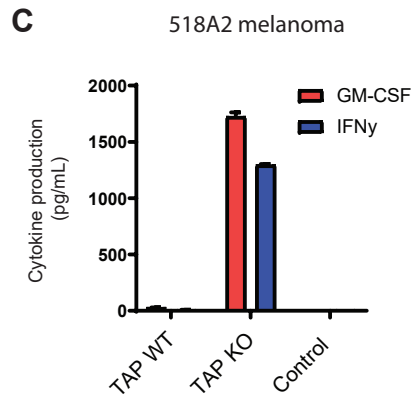

Supplement: 262_2021_2984_MOESM3_ESM.pdf [file 262_2021_2984_MOESM3_ESM.pdf]
